# Supplementary material
Source: publisher site journal article supplement (https://www.spandidos-publications.com/1626/downloadSupplementary)

Figure S1. Radiograph image from (A) T-P and (B) T-H. T-H, twin-healthy; T-P, twin-patient.

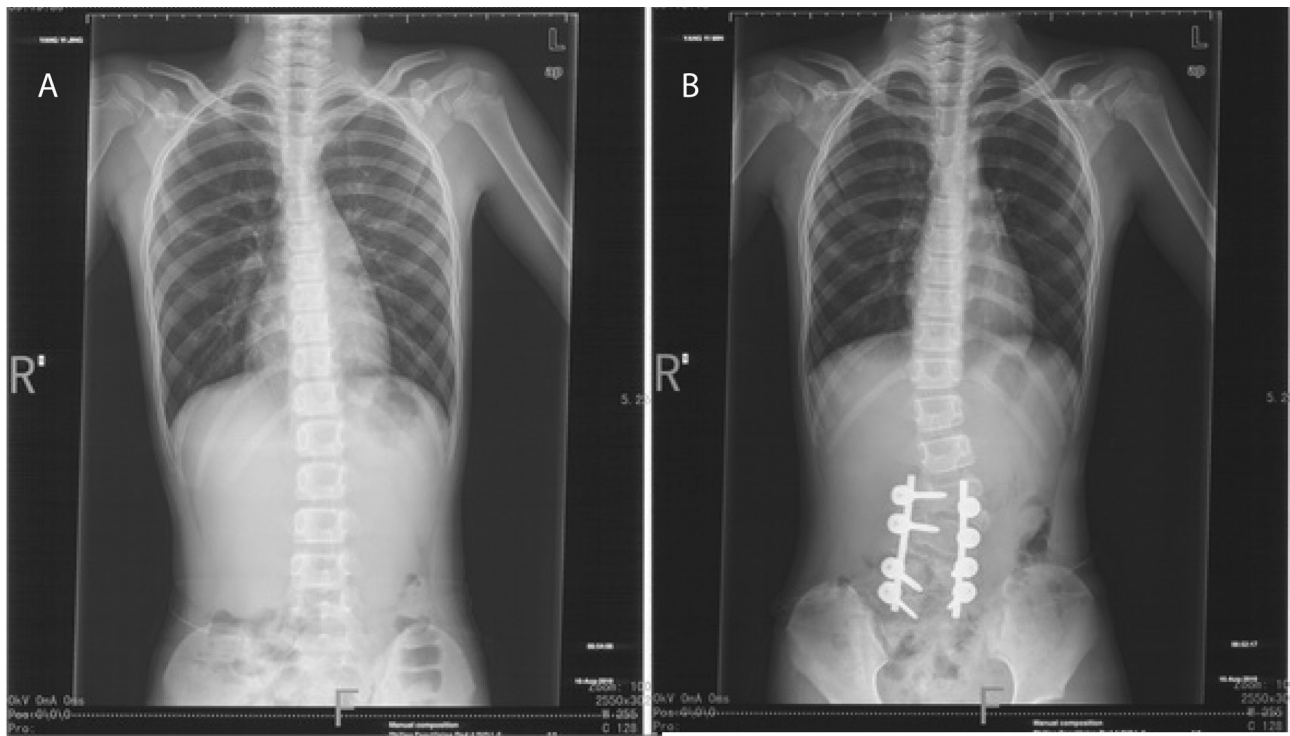

Figure S2. Normalized MeDIP-seq read count of T-H (x-axis) and T-P (y-axis) occurring in the whole genome (left panel) and gene-related region (promoter + gene body; right panel). T-H, twin-healthy; T-P, twin-patient.

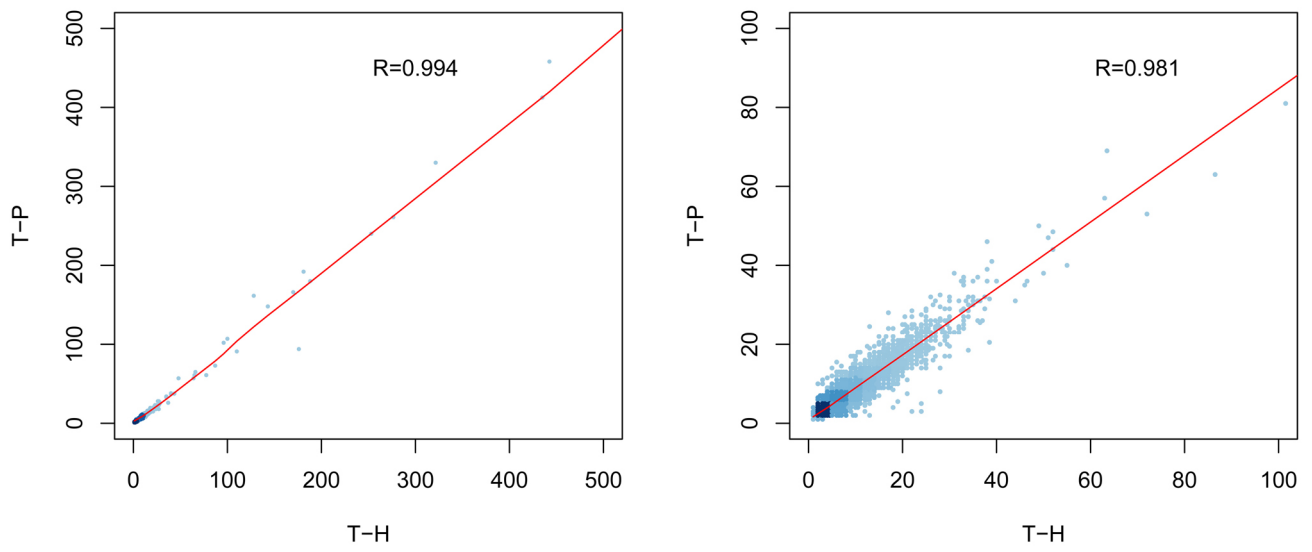

Supplement: Supplementary file 1 [file downloadSupplementary]
